# Supplementary material
Source: PubMed Central journal article supplement (PMC8683569)
Supplement: NIHMS1709163-supplement-Supplementary_File.pdf [file NIHMS1709163-supplement-Supplementary_File.pdf]

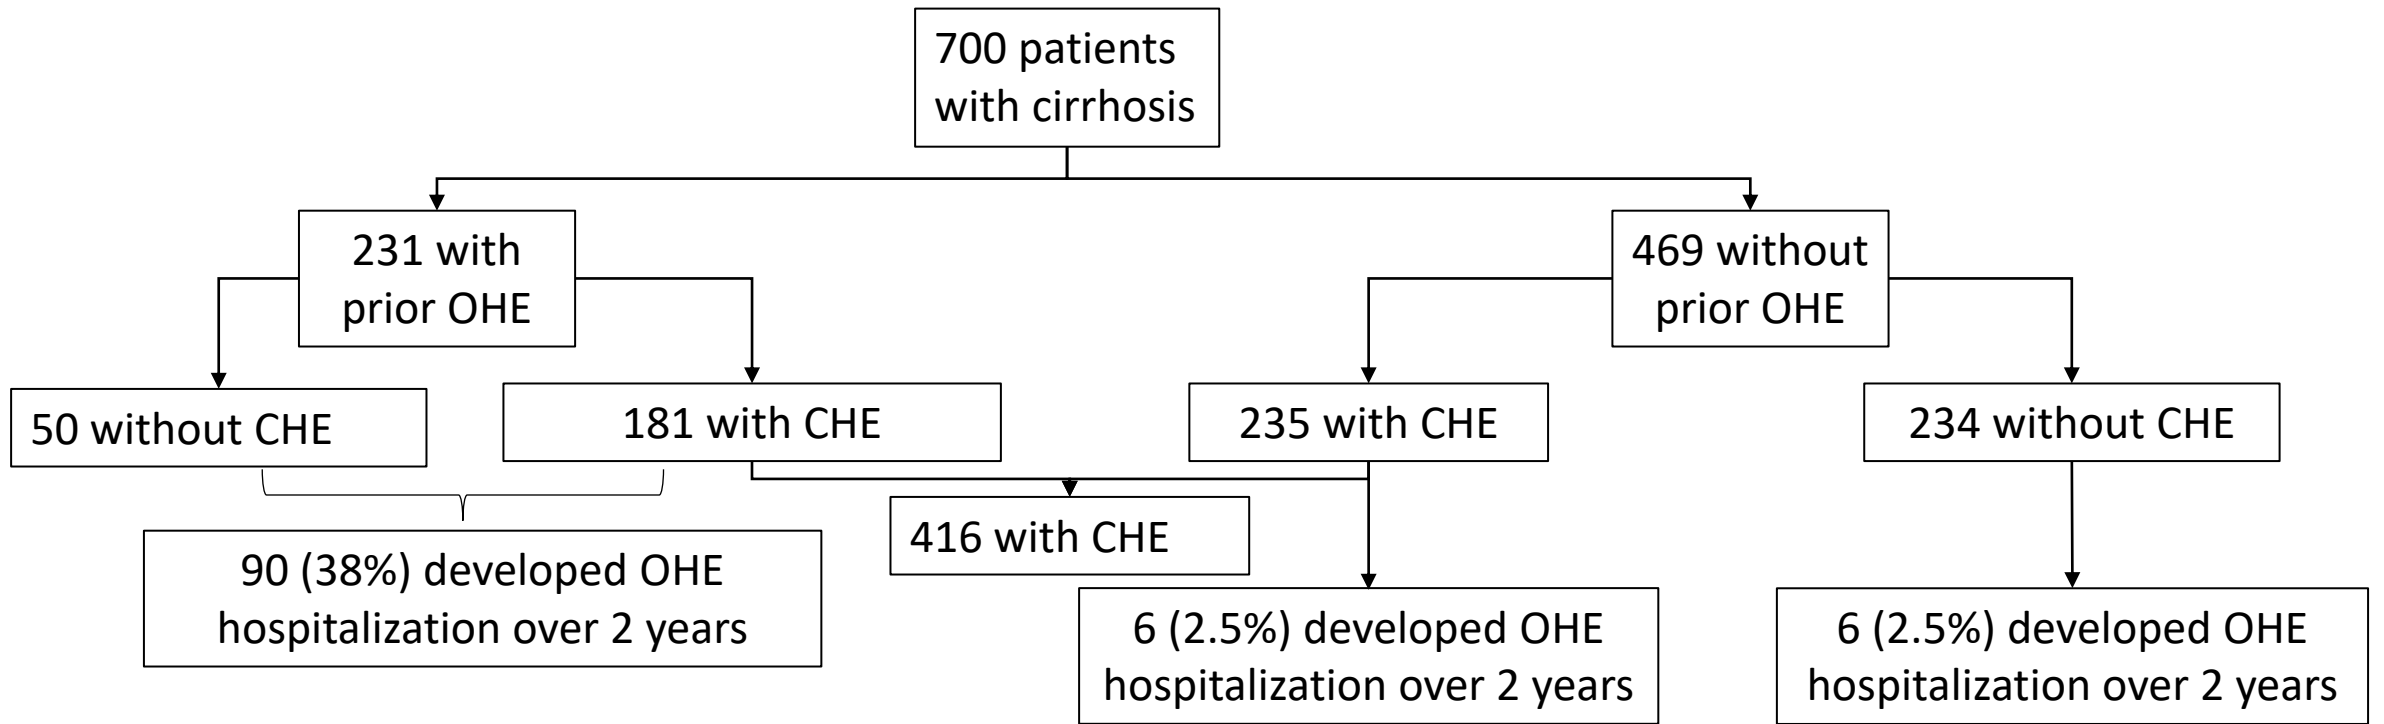

Figure S1: Flow of patients based on CHE, prior OHE or both.

CHE: covert hepatic encephalopathy, OHE: overt hepatic encephalopathy
